# Supplementary material
Source: publisher figshare collection journal article supplement (https://acs.figshare.com/ndownloader/files/18690206)
Supplement: Supplementary file 1 [file 18690206]

## Supporting Information

### **Investigation of Adsorption Thermodynamics at Electrified Liquid-Solid Interfaces by Electrochemically Modulated Liquid Chromatography**

Lisa M. Ponton,<sup>1</sup> David W. Keller,<sup>2</sup> Lorraine M. Siperko,<sup>3</sup> Mark A. Hayes,<sup>4</sup> and Marc D. Porter<sup>5</sup>

<sup>1</sup>Chemistry Department, Baldwin Wallace University, Berea, OH 44017

<sup>2</sup>Charles River Laboratories, Mattawan, MI 49071

<sup>3</sup>Nano Institute of Utah, University of Utah, Salt Lake City, UT 84112

<sup>4</sup>School of Molecular Sciences, Arizona State University, Tempe, AZ 85287

<sup>5</sup>Department of Chemistry, Department of Chemical Engineering, and Nano Institute of Utah, University of Utah, Salt Lake City, UT 84112

\*E-mail: marc.porter@utah.edu

#### Table of Contents

|                                                                                                                                                                                                                                                                                                     |    |
|-----------------------------------------------------------------------------------------------------------------------------------------------------------------------------------------------------------------------------------------------------------------------------------------------------|----|
| <i>SI-1. Determination of <math>V_{sp}</math> (stationary phase volume) and analysis of possible errors</i>                                                                                                                                                                                         | S1 |
| <i>SI-2. Determination of <math>V_{mp}</math> (column void volume) and analysis of possible errors</i>                                                                                                                                                                                              | S3 |
| <i>SI-3. Determination of the potential of zero charge (pzc) for the glassy carbon (GC) packing</i>                                                                                                                                                                                                 | S4 |
| <i>Table SI-1. Chromatographically Determined Values of the pzc for 1,5-NDS in a 95% water:5% acetonitrile (v/v) Mobile Phase Containing NaF, NaCl, LiClO<sub>4</sub>, or NaPF<sub>6</sub>, and <math>\Delta G_{ads}</math> for NaCl, LiClO<sub>4</sub> or for NaPF<sub>6</sub> relative to NaF</i> | S5 |
| <i>SI-4. References</i>                                                                                                                                                                                                                                                                             | S5 |

#### *SI-1. Determination of $V_{sp}$ (stationary phase volume) and analysis of possible errors.*

Exact definitions and measurements for determining the volume of the stationary phase ( $V_{sp}$ ) and the void volume of the mobile phase ( $V_{mp}$ ) can be problematic.<sup>1-7</sup> When using bonded-phase packings in reversed-phase LC (RPLC), one of the most challenging issues in assessing  $V_{sp}$  rests with the location of the “Gibb’s dividing surface.” The Gibb’s dividing surface is the

theoretical boundary between the mobile and stationary phases.<sup>3</sup> In RPLC, the difficulty arises from concerns about how the composition of the mobile phase affects the alkyl chain structure of the coating on the bonded phase, which, in turn, can have an impact on how the solute interacts with the coated surface. Stated differently, it can prove difficult to identify accurately what portion of the bonded-phase coating is involved in the mechanism of retention.

Our experiments do not use a bonded-phase packing or a resin-based ion exchange material. Glassy carbon (GC) is an uncoated, nonporous solid. We have, therefore, made the reasonable assumption that the  $V_{sp}$  is defined by the position of the Gibb's dividing surface, which coincides with the outer boundary of the compact layer in the electrical double layer,<sup>8</sup> and the surface area of the GC packing. We have also assumed that the location of the Gibb's dividing layer is invariant over the range of conditions (*i.e.*, temperature and  $E_{app}$ ) used in our experiments.

The first of the three assumptions is supported by our recent work,<sup>9</sup> which provided strong evidence that the compact layer, and not the diffuse layer, controls the interactions of aromatic sulfonates with the carbonaceous stationary phases used in EMLC. The latter two assumptions reflect the fact that the potential of zero charge ( $pzc$ ) for the GC packing is controlled by the specific adsorption of  $PF_6^-$  for the values of  $E_{app}$  (from -200 to +200 mV vs. AgCl (sat'd NaCl)) used in our experiments.  $PF_6^-$  is the anionic component of the supporting electrolyte in the mobile phase and has a potential of zero ( $pzc$ ) due to specific adsorption to carbon electrode surface of -400 mV (see *Section SI-3* for details on  $pzc$  determination).

As such, the value of  $V_{sp}$  can be found as the product of the total surface area of the stationary phase and the thickness of the compact layer. The actual surface area ( $1.17 \pm 0.03 \times 10^4 \text{ cm}^2$ ) can be calculated from the mass of GC loaded in the column (*i.e.*,  $0.49 \pm 0.01 \text{ g}$ ), and its surface area determined by measurements of Brunauer–Emmett–Teller (BET) isotherms ( $2.39 \pm$

$0.10 \times 10^4 \text{ cm}^2/\text{g}$ ). The thickness of the compact layer,<sup>8, 10</sup> calculated using the dehydrated radius<sup>10</sup> for  $\text{PF}_6^-$ , equals 0.49 nm. Based on this model,  $V_{sp}$  equals 0.57  $\mu\text{L}$ . For comparison, the thickness of the compact layer for fully hydrated  $\text{PF}_6^-$  is 0.54 nm,<sup>10</sup> which translates to a  $V_{sp}$  of  $0.62 \pm 0.02 \mu\text{L}$  that is 9% larger than the value when using the dehydrated size for the anion.

*SI-2. Determination of  $V_{mp}$  (void volume or volume of the mobile phase) and analysis of possible errors.*

The value of  $V_{mp}$  can be determined in several ways, including the minor disturbance method, which uses a non-retained component of the mobile phase as a void marker.<sup>11</sup> Other methods (e.g., pycnometry)<sup>11</sup> were ruled out as possibilities because the uptake of liquid by the Nafion membrane and porous stainless steel used as components in the EMLC column would compromise the measurement. As a result, we determined  $V_{mp}$  by using the pseudo peak for water, which constitutes 95% (v/v) of the mixed mobile phase. From 194 replicate injections, the elution time for the pseudo peak equaled  $0.570 \pm 0.004 \text{ min}$ . This value, when multiplied by the flow rate of the mobile phase ( $0.499 \pm 0.002 \text{ mL/min}$ ), yields a  $V_{mp}$  of  $0.284 \pm 0.003 \text{ mL}$ .

As a check on the validity of this approach, measurements of the pseudo peak for water were carried out in which the solutes were dissolved in acetonitrile:water mixtures of varied composition (0-5% acetonitrile (v/v)) that also varied values of  $E_{app}$ . The pseudo peak for water was also measured in a 95:5% water:acetonitrile mobile phase devoid of supporting electrolyte. These experiments showed no detectable changes in the elution time for the void marker and its utility in the determination of  $V_{mp}$ . Coupled with the value of  $V_{sp}$  (0.57  $\mu\text{L}$ ),  $\phi$  was calculated to be  $2.0 \pm 0.1 \times 10^{-3}$ .

An evaluation of the impact of an error in  $V_{sp}$  indicates that possible differences in the most likely source of error - the thickness of the compact layer - have a small effect on  $\Delta S_{trans}^0$ . For example, a 0.1-nm increase in the thickness of the compact layer translates to an increase in  $\Delta S_{trans}^0$  of 1.4 J/mol-K and  $T\Delta S_{trans}^0$  of 0.3 kJ/mol (25°C), and a decrease in  $\Delta G_{trans}^0$  of 0.3 kJ/mol. A doubling of the thickness of the compact layer from 0.54 to 1.08 yields increases of 5.8 J/mol-K for  $\Delta S_{trans}^0$  and 1.7 kJ/mol for  $T\Delta S_{trans}^0$ , and a decrease of 1.7 kJ/mol for  $\Delta G_{trans}^0$ . These values, which assume a  $V_{mp}$  of 0.284 mL, are ~10% smaller than those reported in this paper, and represent a well-known limitation with this methodology when examining the calculated values of  $\Delta S_{trans}^0$  and  $\Delta G_{trans}^0$ . An analysis of a doubling of  $V_{mp}$ , which approximates water uptake in a Nafion membrane,<sup>12</sup> also translates to differences in  $\Delta S_{trans}^0$ ,  $T\Delta S_{trans}^0$ , and  $\Delta G_{trans}^0$  that are 10% smaller than the values reported herein.

### *SI-3. Determination of the potential of zero charge (pzc) for the glassy carbon packing.*

EMLC differs from conventional LC methodologies because of the ability to manipulate solute retention by changes in  $E_{app}$ . Therefore, EMLC requires the presence of a supporting electrolyte in the mobile phase, which serves the same three purposes found in electrochemistry. The supporting electrolyte: (1) increases the conductivity of the mobile phase; (2) minimizes contributions of migration to mass transport; and (3) enables the reproducible formation of the electrical double layer. Moreover, the supporting electrolyte can alter solute retention by competing for sorption on the stationary phase. This competition is comparable to how the differences in the strength of the interactions for a charged solute and an eluting electrolyte can be used to manipulate separations in ion exchange chromatography.

One of the most effective measures to compare the sorption strength of supporting electrolytes is the  $pzc$ .<sup>8</sup> At the  $pzc$ , the charge of an electrode surface is zero, meaning that the electrostatic driving force for the adsorption of a species solely based on charge is zero. In other words, a solute that interacts with a stationary phase at the  $pzc$  will elute with the injection band. It follows that the  $pzc$  corresponds to the applied potential in which the retention of a solute is invariant with respect to electrolyte concentration.<sup>13</sup> These determinations are often made when using solid electrodes by identifying the minimum in a set of differential capacity-applied potential curves. As we have recently shown,<sup>14</sup> the  $pzc$  can be determined by EMLC through measurements of solute retention (*e.g.*, the capacity factor,  $k'$ ) at different values of  $E_{app}$  and concentrations of supporting electrolyte. In this case, the point of intersection in the collected plots of  $\ln k'$  vs.  $E_{app}$  corresponds to the  $pzc$ . Using this approach, we previously determined the  $pzc$  for the EMLC packing when using NaF, KCl, or LiClO<sub>4</sub> as supporting electrolytes.<sup>14</sup> We have applied that same approach to determining the  $pzc$  for the NaPF<sub>6</sub>-containing mobile phase in the work herein,<sup>15</sup> which is listed as part of **Table SI-1**.

**Table S1.** Chromatographically Determined Values of the  $pzc$  for 1,5-NDS in a 95% water:5% acetonitrile (v/v) Mobile Phase Containing NaF, NaCl, LiClO<sub>4</sub>, or NaPF<sub>6</sub>, and  $\Delta G_{ads}$  for NaCl, LiClO<sub>4</sub> or for NaPF<sub>6</sub> relative to NaF.

| Supporting Electrolyte                 | NaF <sup>a</sup> | KCl <sup>a</sup> | LiClO <sub>4</sub> <sup>a</sup> | NaPF <sub>6</sub> <sup>b</sup> |
|----------------------------------------|------------------|------------------|---------------------------------|--------------------------------|
| $pzc$ (mV) <sup>c</sup>                | $-25 \pm 13$     | $-280 \pm 13$    | $-325 \pm 24$                   | $-400 \pm 30$                  |
| $\Delta pzc$ (mV) <sup>d</sup>         | --               | -255             | -300                            | -375                           |
| $\Delta G_{ads}$ (kJ/mol) <sup>d</sup> | --               | -50              | -58                             | -72                            |

a) From Table 2 in D. W. Keller and M. D. Porter, Anal. Chem. 2005, 77, 7399-7407.

b) J. A. Williams and M. D. Porter, University of Utah, unpublished results.

c) Applied potentials are reported with respect to Ag/AgCl (sat'd NaCl).

d)  $\Delta pzc = pzc \text{ of } ion_i - pzc_{NaCl}$ , where  $i$  is either NaCl, LiClO<sub>4</sub>, or NaPF<sub>6</sub> (*e.g.*,  $pzc_{KCl} - pzc_{NaF}$ ) as differences of averages.

e)  $\Delta G_{ads} = zF\Delta pzc$ , where  $z$  is the charge with sign on the supporting electrolyte ion and  $F$  is the Faraday.

#### SI-4. References

1. Riedo, F.; Kovats, E. S., Adsorption from liquid mixtures and liquid chromatography, *J. Chromatogr. A* **1982**, 239, 1-28.
2. Shibukawa, M.; Ohta, N., A new method for the determination of mobile phase volume in normal and reversed-phase liquid chromatography, *Chromatographia* **1988**, 25, 288-294.
3. Yun, K. S.; Zhu, C.; Parcher, J. F., Theoretical relationships between the void volume, mobile phase volume, retention volume, adsorption, and gibbs free energy in chromatographic processes, *Anal. Chem.* **1995**, 67, 613-619.
4. Poole, C. F., *The essence of chromatography*. Elsevier: Boston, 2003.
5. Chester, T. L.; Coym, J. W., Effect of phase ratio on van't Hoff analysis in reversed-phase liquid chromatography, and phase-ratio-independent estimation of transfer enthalpy, *J. Chromatogr. A* **2003**, 1003, 101-111.
6. Sentell, K. B.; Dorsey, J. G., On the calculation of the stationary phase volume in reversed phase chromatography, *J. Liq. Chromatogr.* **1988**, 11, 1875-1885.
7. Moldoveanu, S.; David, V., Estimation of the phase ratio in reversed-phase high-performance liquid chromatography, *J. Chromatogr. A* **2015**, 2015, 194-201.
8. Bard, A. J.; Faulkner, L. R., *Electrochemical methods: Fundamentals and applications*. 2nd ed.; John Wiley & Sons: New York, 2001; p 534-579.
9. Keller, D.; Ponton, L.; Porter, M. D., Assessment of supporting electrolyte contributions in electrochemically modulated liquid chromatography, *J. Chromatogr. A* **2005**, 1089, 72-81.
10. Marcus, Y., *Ion properties*. Marcel Dekker, Inc.: New York, 1997; p 34.
11. Rimmer, C. A.; Simmons, C. R.; Dorsey, J. G., The measurement and meaning of void volumes in reversed-phase liquid chromatography, *J. Chromatogr. A* **2002**, 965, 219-232.
12. Majsztrik, P. W.; Satterfield, M. B.; Bocarsly, A. B.; Benziger, J. B., Water sorption, desorption and transport in nafion membranes, *J. Membr. Sci.* **2007**, 301, 93-106, and references therein.
13. Valette, G., Double layer on silver single-crystal electrodes in contact with electrolytes having anions which present a slight specific adsorption: Part i. The (110) face, *J. Electroanal. Chem.* **1981**, 122, 285-297.
14. Keller, D. W.; Porter, M. D., Electrochemically modulated liquid chromatography and the Gibbs adsorption equation, *Anal. Chem.* **2005**, 77, 7399-7407.
15. Williams, J. A.; Porter, M. D., Unpublished results, University of Utah.
